# Supplementary material for: Universal laser-assisted growth of transition metal nanoparticles on a flexible graphene electrode for a nonenzymatic glucose sensor
Source: Royal Society of Chemistry journal article supplement (doi:10.1039/d0nj04200e), 2020-01-01
Supplement: d0nj04200e1.pdf [file d0nj04200e1.pdf]

**A universal laser-assistant growth of transition metal nanoparticle on flexible  
graphene electrode for nonenzymatic glucose sensor**

Wuyun Xie<sup>2,3</sup>, Guang Yang, Mingqi Xu<sup>2,3</sup>\*, and Xiangjie Bo<sup>1</sup>, \*

<sup>1</sup>. Key Laboratory of Nanobiosensing and Nanobioanalysis at Universities of Jilin Province, Faculty of Chemistry, Northeast Normal University, Changchun, 130024, China

<sup>2</sup>. School of Physics, Northeast Normal University, Changchun, 130024, China

<sup>3</sup>. Jilin Province key Laboratory of the advanced energy development and the innovative application, Changchun 130024, China

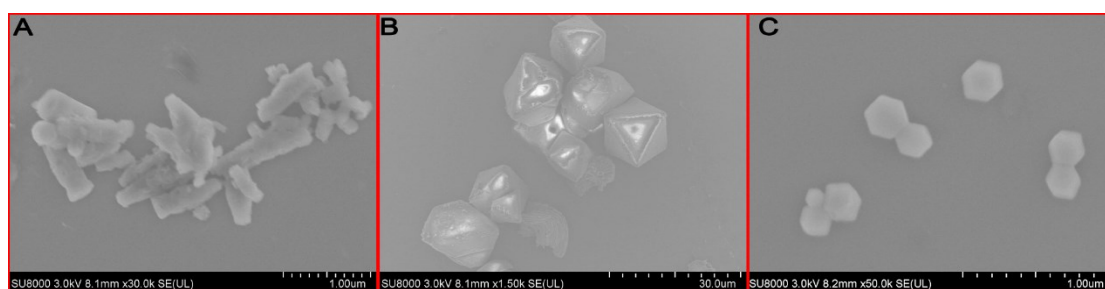

**Figure S1** SEM images of Ni-MOFs, Cu-MOFs and Co-MOFs.

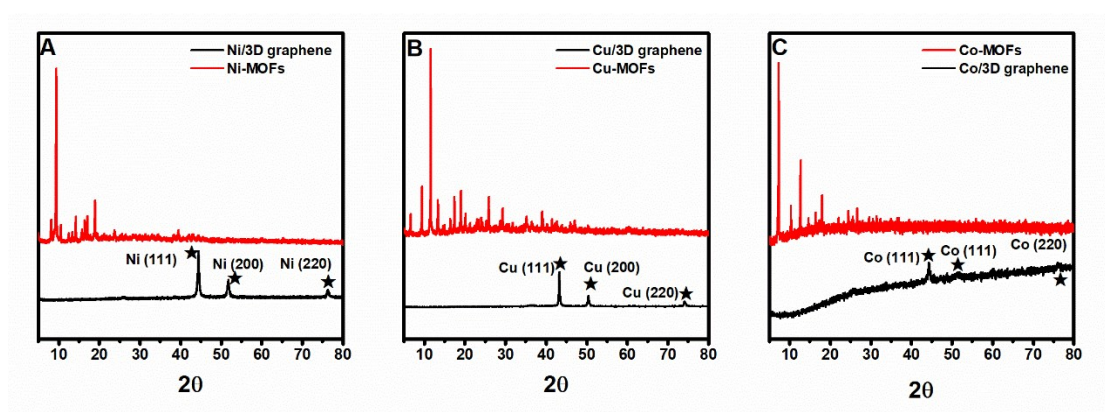

**Figure S2** XRD patterns of (A) Ni-MOFs and their derived sample, (B) Cu-MOFs and their derived sample, (C) Co-MOFs and their derived sample.

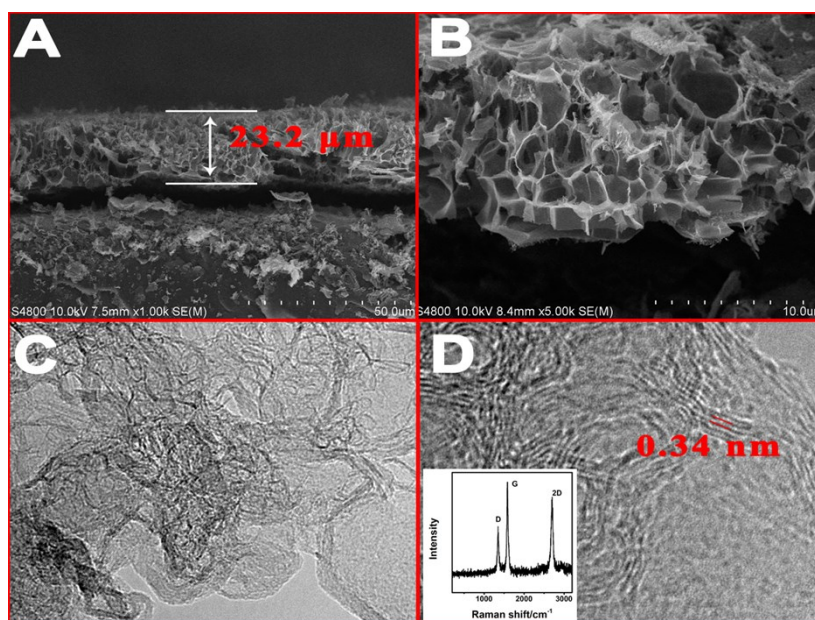

**Figure S3** (A-B) SEM images of 3D GR. (C) TEM and (D) HRTEM images of 3D GR. Inset of (D): Raman spectrum of 3D GR.

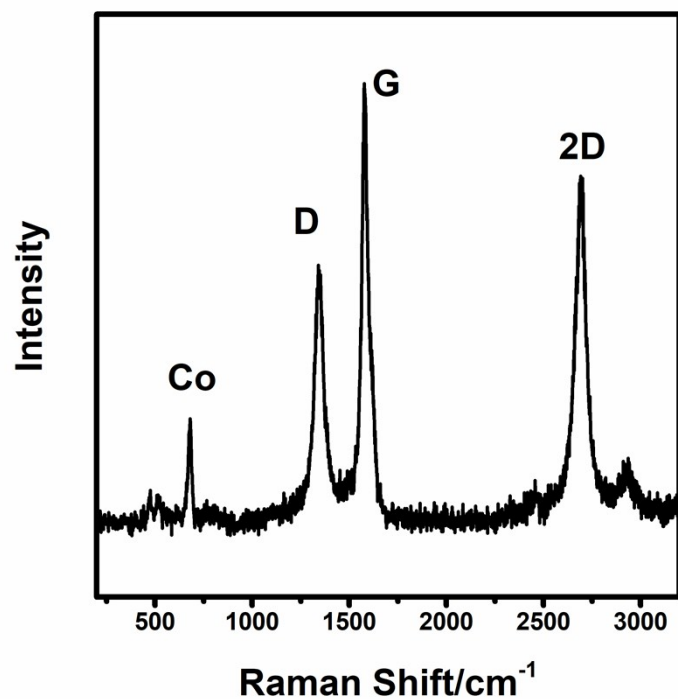

**Figure S4** Raman spectrum of Co-MOFs-derived sample prepared by laser treatment of Co-MOFs on stainless steel.

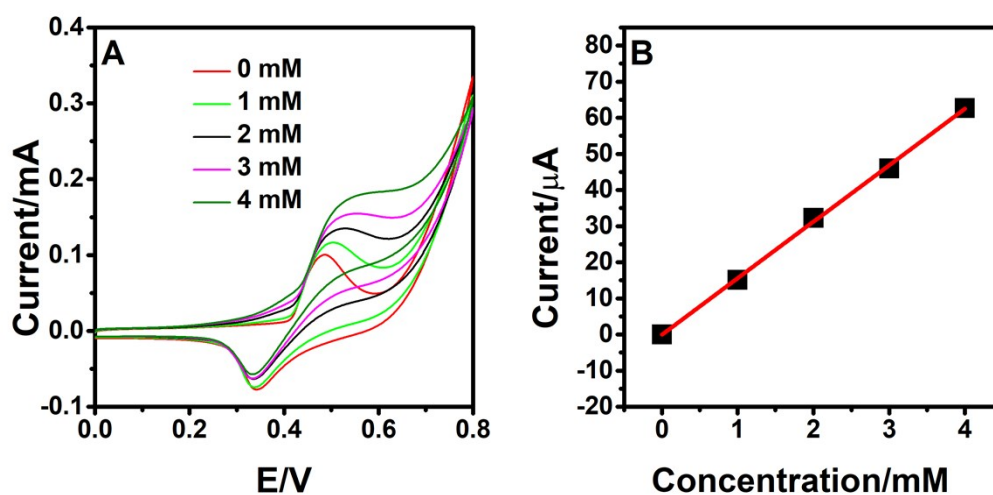

**Figure S5** (A) CV responses of Ni/3D GR in 0.1 M NaOH containing different glucose. (E) The calibration curve of Ni/3D GR.

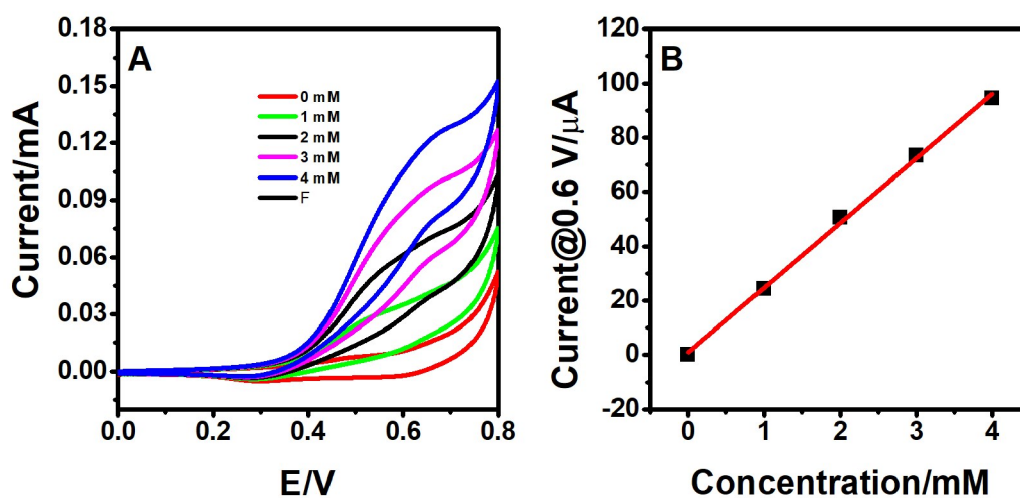

**Figure S6** (A) CV responses of Cu/3D GR in 0.1 M NaOH containing different glucose. (E) The calibration curve of Cu/3D GR.

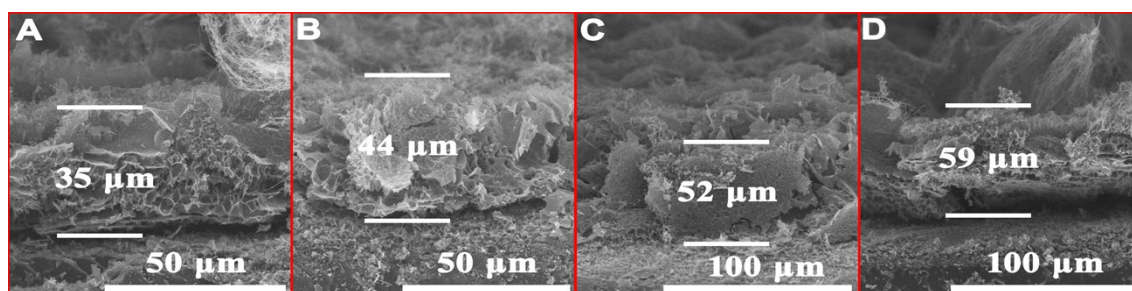

**Figure S7** Cross-section SEM images of Co/3D GR with the precursor concentration of (A) 5 mg mL<sup>-1</sup>, (B) 10 mg mL<sup>-1</sup>, (C) 15 mg mL<sup>-1</sup>, and (D) 20 mg mL<sup>-1</sup>

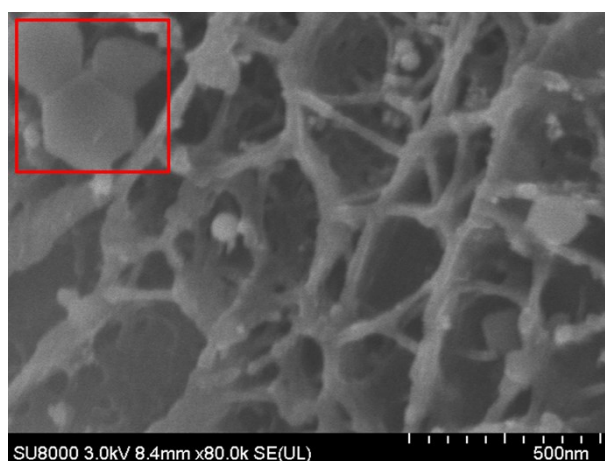

**Figure S8** SEM image of Co/3D GR with the precursor concentration of 25 mg mL<sup>-1</sup>.

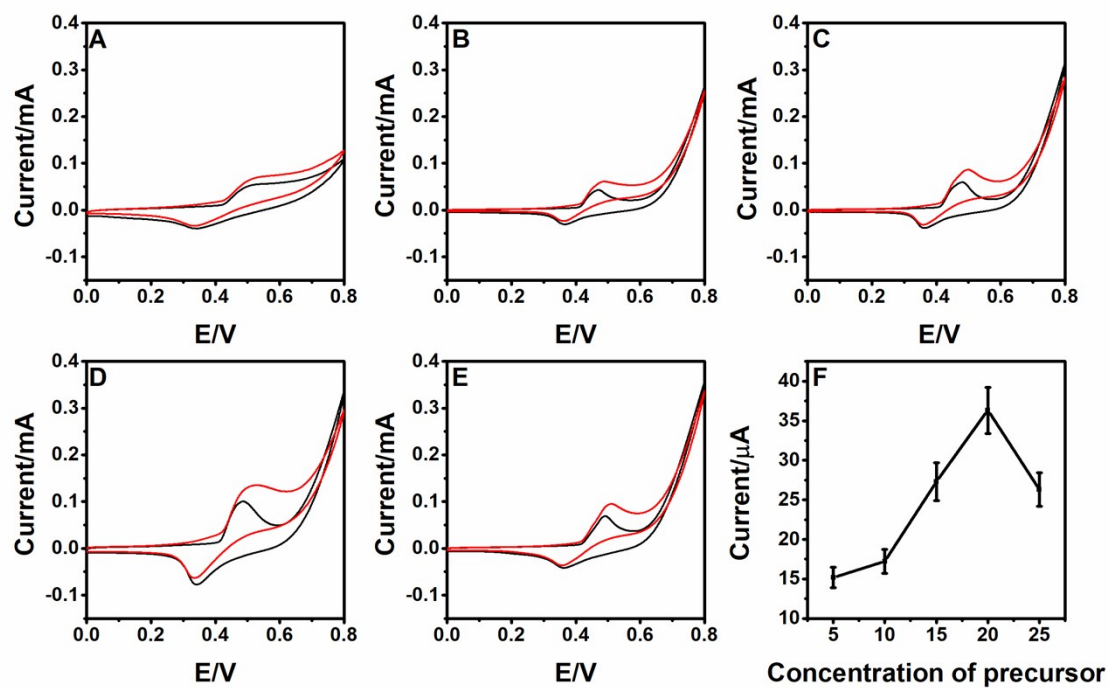

**Figure S9** CV responses of Ni/3D GR at precursor concentration of (A) 5 mg mL<sup>-1</sup>, (B) 10 mg mL<sup>-1</sup>, (C) 15 mg mL<sup>-1</sup>, (D) 20 mg mL<sup>-1</sup> and (E) 25 mg mL<sup>-1</sup> in the 0 (black line) and 2 (red line) mM glucose in 0.1 M NaOH. (F) The dependence of current response on the concentration of precursor.



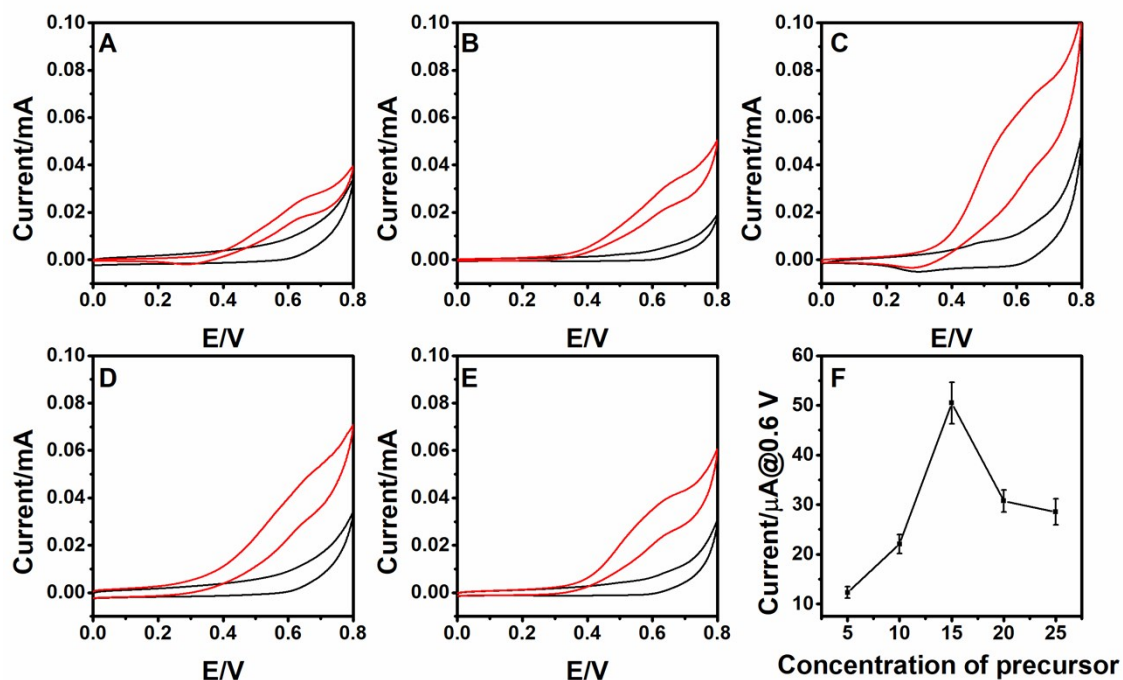

**Figure S10** CV responses of Cu/3D GR at precursor concentration of (A) 5 mg mL<sup>-1</sup>, (B) 10 mg mL<sup>-1</sup>, (C) 15 mg mL<sup>-1</sup>, (D) 20 mg mL<sup>-1</sup> and (E) 25 mg mL<sup>-1</sup> in the 0 (black line) and 2 (red line) mM glucose in 0.1 M NaOH. (F) The dependence of current response on the concentration of precursor.

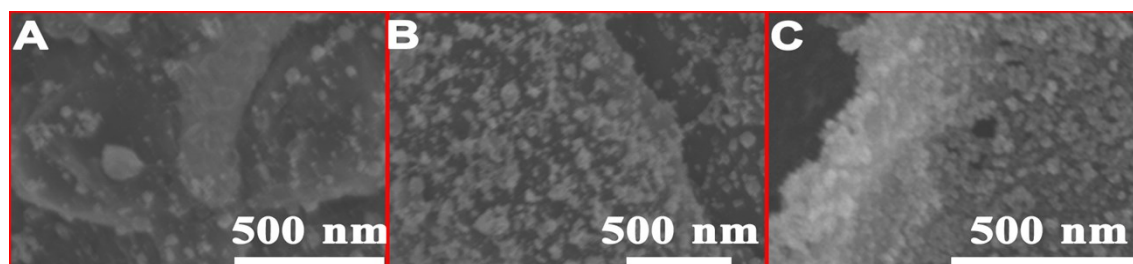

**Figure S11** SEM images of Co/3D Gr at laser power of (A) 6 W, (B) 7 W and (C) 9 W.

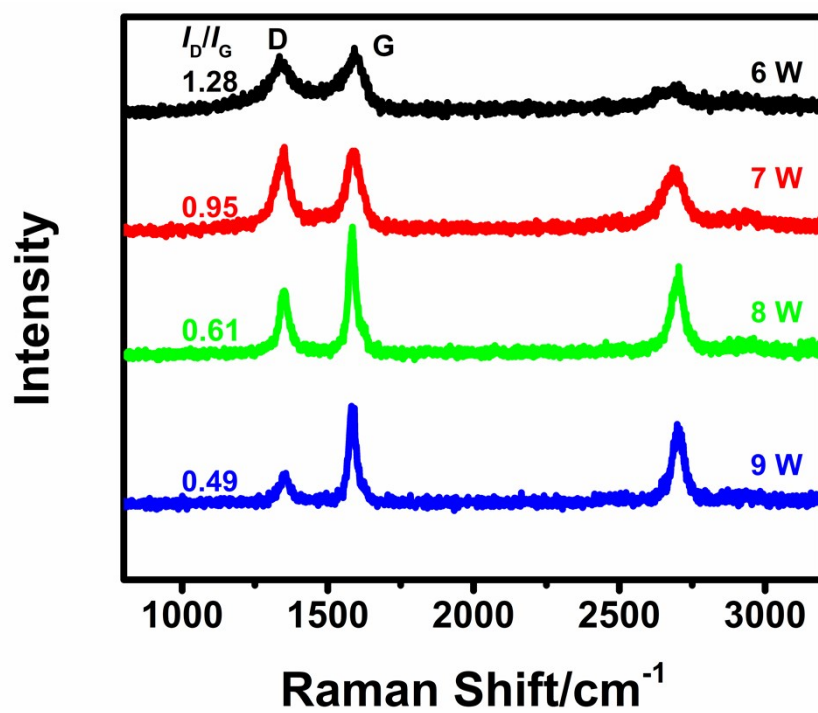

**Figure S12** Raman spectra of Co/3D GR prepared at different laser power.

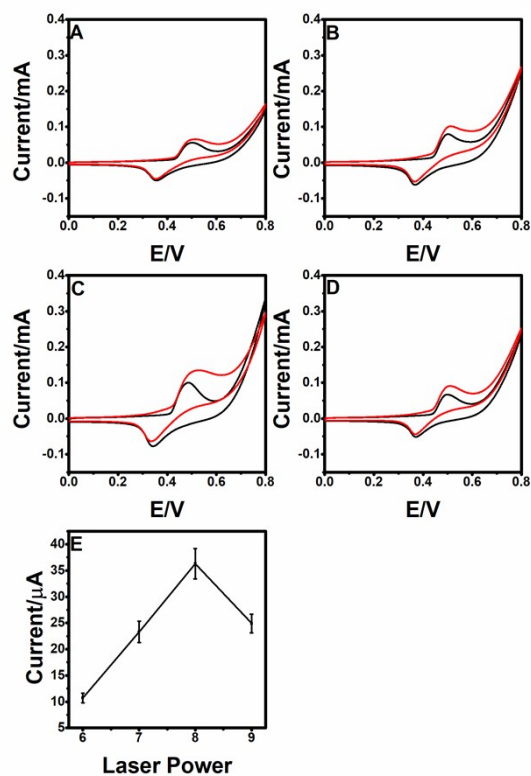

**Figure S13** CV responses of Ni/3D GR at laser power of (A) 6 W, (B) 7 W (C) 8 W, (D) 9 W in the 0 (black line) and 2 (red line) mM glucose in 0.1 M NaOH. (E) The dependence of current response of Ni/3D GR on the laser power.



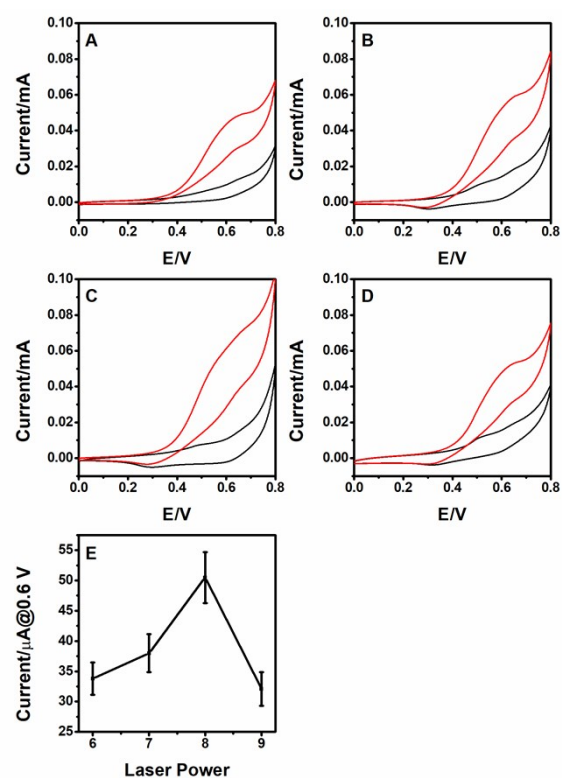

**Figure S14** CV responses of Cu/3D GR at laser power of (A) 6 W, (B) 7 W (C) 8 W, (D) 9 W in the 0 (black line) and 2 (red line) mM glucose in 0.1 M NaOH. (E) The dependence of current response of Cu/3D GR on the laser power.

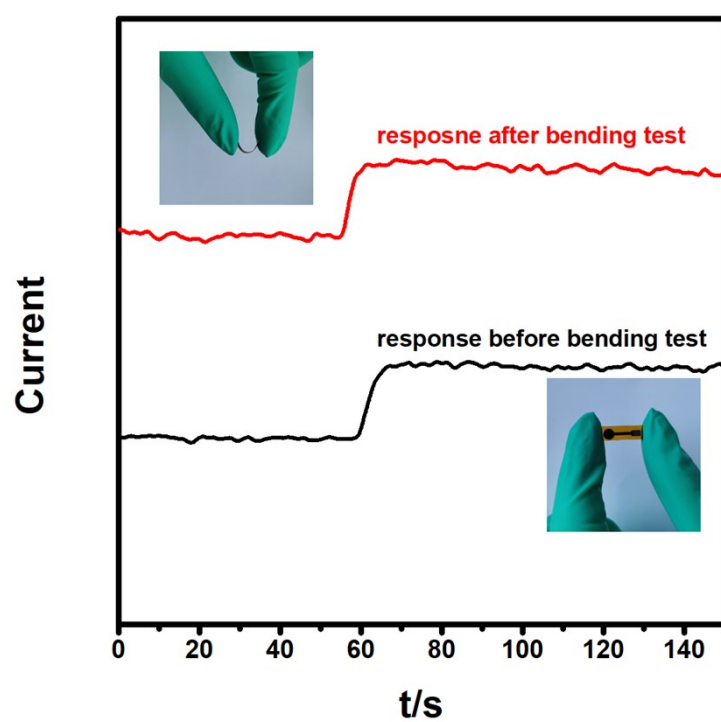

**Figure S15** The electrochemical response before and after bending test.

**Table S1** Comparison of preparative method and analytical performance of Co/3D GR with other MOFs-derived sensors.

| Electrode                                                                         | preparative method                           | Sensitivity ( $\mu\text{A mM}^{-1} \text{cm}^{-2}$ ) | Linear range ( $\mu\text{M}$ ) | LOD ( $\mu\text{M}$ ) | Reference |
|-----------------------------------------------------------------------------------|----------------------------------------------|------------------------------------------------------|--------------------------------|-----------------------|-----------|
| GR@ZIF-67                                                                         | In situ liquid-phase growth/ 3h/Air          | 1521.1                                               | 1-805.5                        | 0.36                  | 1         |
| ZIF-N <sub>2</sub> <sup>a</sup>                                                   | Thermal annealing/ 6h/700°C/N <sub>2</sub>   | 227                                                  | 100-1100                       | 5.69                  | 2         |
| CoP/Co-BP <sup>b</sup>                                                            | Thermal annealing/2h/ 900°C/N <sub>2</sub>   | 6427                                                 | 0.5-1800                       | 0.2                   | 3         |
| NiCo <sub>2</sub> O <sub>4</sub> HNCs/GCE <sup>c</sup>                            | Thermal annealing/1h/350°C/ N <sub>2</sub>   | 1306                                                 | 0.18-5100                      | 0.027                 | 4         |
| RGO-Co <sub>3</sub> O <sub>4</sub> <sup>d</sup>                                   | Thermal annealing/3h/550°C/ N <sub>2</sub>   | 1315                                                 | 1-500                          | 0.4                   | 5         |
| Co <sub>3</sub> O <sub>4</sub> /NiCo <sub>2</sub> O <sub>4</sub> /CC <sup>e</sup> | Thermal annealing/2h/ 350°C/Air              | 12835                                                | 1-1127                         | 0.64                  | 6         |
| Cuo NWs@Co <sub>3</sub> O <sub>4</sub>                                            | Thermal annealing/3h/ 350°C/Air              | 6082 $\mu\text{A } \mu\text{M}^{-1}$                 | 0.5-100                        | 0.23                  | 7         |
| Ag@ZIF-67                                                                         | sequential deposition-reduction/12h/80°C/Air | 379                                                  | 2-1000                         | 0.66                  | 8         |
| NiCo- MOF                                                                         | Thermal annealing/4h/120°C/ N <sub>2</sub>   | 684.4                                                | 1-8000                         | 0.29                  | 9         |
| Co-MOF/NF <sup>f</sup>                                                            | Hydrothermal treatment/12h/125°C/ Air        | 10886                                                | 10-3000                        | 0.001                 | 10        |
| 3D- KSCs/Co <sub>3</sub> O <sub>4</sub> <sup>g</sup>                              | Thermal annealing/4h/400°C/ N <sub>2</sub>   | 1377.8                                               | 88-7000                        | 26                    | 11        |
| 3D/GR                                                                             | Laser irradiation/air/room temperature       | 1411.2                                               | 10-3020                        | 2.7                   | This work |

a□ ZIF-N<sub>2</sub> : pyrolysis of ZIF-67 under N<sub>2</sub> atmosphere.

b□ CoP/Co-BP: buckypaper decorated with CoP/Co.

c□ NiCo<sub>2</sub>O<sub>4</sub>HNCs/GCE: NiCo<sub>2</sub>O<sub>4</sub> hollow nanocages modified glass carbon electrode.

d□ ZIF-67 derived Co<sub>3</sub>O<sub>4</sub> anchored reduced graphene oxide sheets.

e□ Co<sub>3</sub>O<sub>4</sub> hollow nanocubes on carbon cloth-supported NiCo<sub>2</sub>O<sub>4</sub> nanowires.

f□ Co-MOF/NF: Co-MOF array on Ni foam.

g□ 3D-KSCs/hierarchical Co<sub>3</sub>O<sub>4</sub>:Three-dimensional kenaf stem-derived carbon/ hierarchical Co<sub>3</sub>O<sub>4</sub>

**Table S2** Detection of glucose level in serum sample using Co/3D GR electrode.

| Sample | Concentration by hospital<br>determined by<br>spectroscopic method<br>(mM) | Concentration by<br>sensor<br>(mM) | Relative<br>error | RSD% (n=3) |
|--------|----------------------------------------------------------------------------|------------------------------------|-------------------|------------|
| 1      | 5.7                                                                        | 5.4                                | -5.5%             | 6.7        |
| 2      | 6.9                                                                        | 6.4                                | -7.2%             | 4.2        |
| 3      | 9.4                                                                        | 9.1                                | -3.3%             | 7.1        |

## Reference

- S1. Chen, X.; Liu, D.; Cao, G.; Tang, Y.; Wu, C., In Situ Synthesis of a Sandwich-like Graphene@ZIF-67 Heterostructure for Highly Sensitive Nonenzymatic Glucose Sensing in Human Serums. *ACS Appl. Mater. Interfaces* **2019**, *11* (9), 9374-9384.
- S2. Shi, L.; Li, Y.; Cai, X.; Zhao, H.; Lan, M., ZIF-67 derived cobalt-based nanomaterials for electrocatalysis and nonenzymatic detection of glucose: Difference between the calcination atmosphere of nitrogen and air. *J. Electroanal. Chem.* **2017**, *799*, 512-518.
- S3. Hou, C.; Zhang, X.; Wang, L.; Zhang, F.; Huang, X.; Wang, Z., A buckypaper decorated with CoP/Co for nonenzymatic amperometric sensing of glucose. *Microchim. Acta* **2020**, *187* (2), 101.
- S4. Feng, Y.; Xiang, D.; Qiu, Y.; Li, L.; Li, Y.; Wu, K.; Zhu, L., MOF-Derived Spinel NiCo<sub>2</sub>O<sub>4</sub> Hollow Nanocages for the Construction of Non-enzymatic Electrochemical Glucose Sensor. *Electroanalysis* **2020**, *32* (3), 571-580.
- S5. Vilian, A. T. E.; Dinesh, B.; Rethinasabapathy, M.; Hwang, S.-K.; Jin, C.-S.; Huh, Y. S.; Han, Y.-K., Hexagonal Co<sub>3</sub>O<sub>4</sub> anchored reduced graphene oxide sheets for high-performance supercapacitors and non-enzymatic glucose sensing. *J. Mater. Chem. A* **2018**, *6* (29), 14367-14379.
- S6. Guo, Q.; Zeng, W.; Liu, S.; Li, Y., In situ formation of Co<sub>3</sub>O<sub>4</sub> hollow nanocubes on carbon cloth-supported NiCo<sub>2</sub>O<sub>4</sub> nanowires and their enhanced performance in non-enzymatic glucose sensing. *Nanotechnology* **2020**, *31* (26), 265501.
- S7. Muthurasu, A.; Kim, H. Y., Fabrication of Hierarchically Structured MOF-Co<sub>3</sub>O<sub>4</sub> on Well-aligned CuO Nanowire with an Enhanced Electrocatalytic Property. *Electroanalysis* **2019**, *31* (5), 966-974.
- S8. Meng, W.; Wen, Y.; Dai, L.; He, Z.; Wang, L., A novel electrochemical sensor for glucose detection based on Ag@ZIF-67 nanocomposite. *Sens. Actuators, B* **2018**, *260*, 852-860.
- S9. Li, W.; Lv, S.; Wang, Y.; Zhang, L.; Cui, X., Nanoporous gold induced vertically standing 2D NiCo bimetal-organic framework nanosheets for non-enzymatic glucose biosensing. *Sens. Actuators, B* **2019**, *281*, 652-658.
- S10. Li, Y.; Xie, M.; Zhang, X.; Liu, Q.; Lin, D.; Xu, C.; Xie, F.; Sun, X., Co-MOF nanosheet array: A high-performance electrochemical sensor for non-enzymatic glucose detection. *Sens. Actuators, B* **2019**, *278*, 126-132.
- S11. Wang, L.; Zhang, Y.; Xie, Y.; Yu, J.; Yang, H.; Miao, L.; Song, Y., Three-dimensional

macroporous carbon/hierarchical  $\text{Co}_3\text{O}_4$  nanoclusters for nonenzymatic electrochemical glucose sensor.  
*Appl. Surf. Sci.* **2017**, *402*, 47-52.
